# Supplementary material for: Überprüfung visueller Defizite durch die Polizei bei Verkehrsteilnehmern in Deutschland
Source: Springer Nature journal article supplement (doi:10.1007/s00347-023-01928-z), 2023-10-02
Supplement: MOESM1 [file 26116676]

## Anhang 2 – Gesichtsfeld und Testverfahren<sup>1</sup>

### Erläuterungen

Ein normales Gesichtsfeld erstreckt sich von ca. 90 Grad auf der Schläfenseite bis 60 Grad auf der Nasenseite. In den Sehnerven und im Gehirn sind die zentralen Gesichtsfeldanteile verhältnismässig stark überrepräsentiert. Deshalb betreffen Erkrankungen des visuellen Systems die zentralen Anteile viel häufiger als die peripheren Anteile. Bei der Beurteilung des Gesichtsfeldes sind deshalb die zentralen Anteile wichtiger als das periphere Gesichtsfeld.

Gängige Erkrankungen wie zB Schlaganfall machen Halbseitenausfälle nach rechts oder links, die sehr nach zentral reichen und ganze Quadranten ausfüllen können, oder auch innerhalb der zentralen 30 Grad primär bestehen (Glaukom).

Nur eine vererbliche Netzhauterkrankung führt zu einer röhrenförmige Gesichtsfeldeinschränkung, die Retinopathia pigmentosa → "Tunnelblick".

Diese Erkrankung ist allerdings extrem selten und muss deshalb bei einer Verkehrskontrolle nicht explizit getestet werden.

Bei der Gesichtsfeldprüfung gibt es verschiedene Techniken; am weitesten verbreitet ist die Überprüfung der Gesichtsfeldaussengrenzen.

### Durchführung

- Proband und Testdurchführender sitzen oder stehen sich auf gleicher Höhe gegenüber; der Abstand zwischen beiden Personen sollte eine Armlänge betragen. Auf Höhengleichheit der Augen ist zu achten !

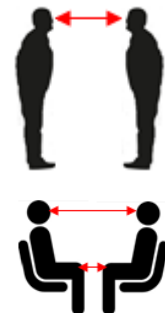

Der Proband deckt zuerst sein rechtes Auge ab, der Testdurchführende sein linkes Auge.

Hierbei ist darauf zu achten, dass die Finger des Probanden geschlossen sind und kein Druck auf das Auge ausgeübt wird (hohler Handteller)

- der Proband fixiert das gegenüberliegende, offene Auge des Testdurchführenden

- der Testdurchführende bereitet gedanklich Quadranten um das Auge des Probanden vor

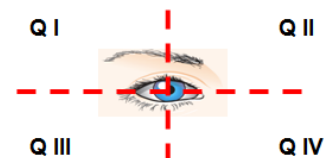

- der Testdurchführende hebt seine Hand mit einer beliebigen Fingeranzahl in Pos 1, (sh. nachfolgende Skizze) bewegt dort die Finger / Hand und fragt den Probanden, ob er die Hand (ja/nein) und welche Bewegung er sieht

Hinweis: das Erkennen der Fingeranzahl in Pos 1 ist nicht zu erwarten, das Erkennen der Hand und das Bewegen der Finger/Hand hingegen schon.

<sup>1</sup> Testverfahren: Prof. Dr. med, Carsten Framme, MBA; Dr. Martin Bartram – Universitätsklinik für Augenheilkunde der MHH, Hannover  
PD Dr. Dr. Mathias Abegg, Universitätsklinik für Augenheilkunde, Bern

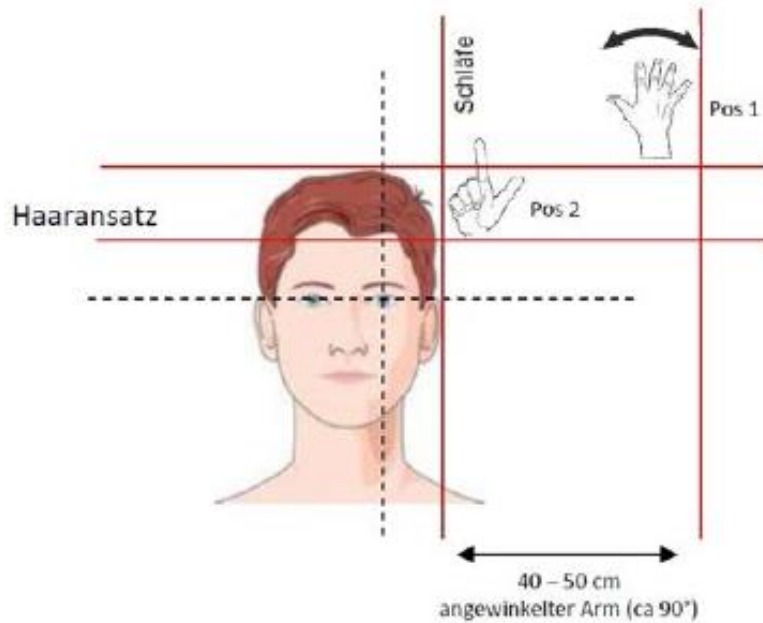

- der Testdurchführende bewegt seine Hand mit einer beliebigen Fingeranzahl in Pos 2 und erfragt die Anzahl der Finger
- dabei ist zu darauf zu achten, dass der Proband seine Augenposition nicht verändert (Fixieren des Auges des Testdurchführenden)
- als erkannt gilt, wenn die gezeigte Fingeranzahl richtig wiedergegeben wird
- Durchführung des Tests in jedem Quadranten und mit dem anderen Auge  
Jede Fingerposition sollte 1- 2 x gezeigt werden. Im Falle des Nichterkennens ist eine dritte Wiederholung erforderlich

#### Dokumentation - **aus PRÜFERSICHT!!!** -

z.B:

linkes Auge:

Ausfälle im Quadrant L I + LZ III

rechtes Auge:

Ausfälle im Quadrant RZ II + R II

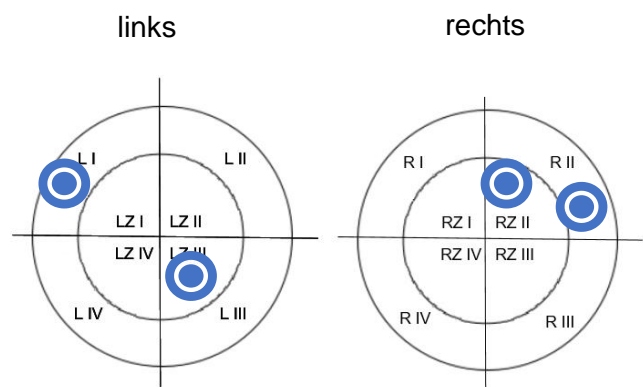

#### Bewertung

Die Finger sollten in diesem Prüffeld erkannt werden; anderenfalls würde ein signifikanter Ausfall mit höchster Wahrscheinlichkeit vorliegen.

Ein Ausfall nur in einem Quadranten stellt eine bedeutende Beeinträchtigung dar und ist hinsichtlich der Fahrtüchtigkeit schon nicht mehr akzeptabel.

Stand: 06.02.2019
