# Supplementary material for: Überprüfung visueller Defizite durch die Polizei bei Verkehrsteilnehmern in Deutschland
Source: Springer Nature journal article supplement (doi:10.1007/s00347-023-01928-z), 2023-10-02
Supplement: MOESM2 [file 26116676]

## Überprüfung des Sehvermögens bei Kraftfahrzeugführern hier: gesetzlich geforderter Sehschärfe (Visus) von 0,5

### **Allgemeines**

Gutes Sehvermögen ist eine unabdingbare Voraussetzung für eine sichere Teilnahme am Straßenverkehr. Unter Sehvermögen versteht man die Gesamtheit aller Sehfunktionen. Zu den für die Teilnahme am Straßenverkehr wichtigsten Funktionen zählen:

- die Sehschärfe,
- das Gesichtsfeld,
- das Dämmerungssehvermögen und die Blendempfindlichkeit,
- das Farbsehen,
- die Stellung und Motilität der Augen sowie das stereoskopische Sehen.

Im Nachfolgenden wird ausschließlich auf die Sehschärfe eingegangen.

Die Sehschärfe ist die Fähigkeit, Konturen und Details von Objekten wahrzunehmen und sie zu erkennen.

Der Visus ist von verschiedenen Faktoren, wie den optischen Eigenschaften des Objektes oder der Abbildungsqualität auf der Netzhaut pp., abhängig.

Auch physiologische Abläufe – wie der Alterungsprozess - wirken sich auf den Sehschärfe aus; so liegt der Visus bei einem 20-jährigen Menschen bei 1,0 bis 1,6, bei einem 80-jährigen bei 0,6 bis 1,0.

Die Sehschärfe wird für die Ferne (Fernvisus) und die Nähe (Nahvisus) geprüft.

Durch eine intakte Akkommodationsfähigkeit<sup>1</sup> werden unter 40 – 45 Jährige sowohl in der Nähe als auch in der Ferne gleich gut und scharf sehen können. Ältere Menschen hingegen werden aufgrund des Akkommodationsverlustes im Nahbereich Defizite aufweisen.

Dieser Akkommodationsverlust führt zu der Alterssichtigkeit oder Altersweitsichtigkeit (Presbyopie).

### **Rechtliche Anforderungen**

Die rechtlichen Anforderungen an das Sehvermögen sind in der Anlage 6 der Fahrerlaubnisverordnung formuliert.

Es wird hierbei zwischen einem Fahrerlaubnisbewerber und –inhaber unterschieden.

Bei einem Fahrerlaubnis**inhaber** sind an die (zentrale Tages-) Sehschärfe folgende Mindestanforderungen gestellt:

|                                                               |
|---------------------------------------------------------------|
| Sehschärfe des besseren Auges oder beidäugige Sehschärfe: 0,5 |
|---------------------------------------------------------------|

Die Sehschärfenwerte dürfen nicht unterschritten werden; Fehlsichtigkeiten müssen - soweit möglich und verträglich - korrigiert werden.

---

<sup>1</sup> Akkommodation ist die dynamische Anpassung der Brechkraft des Auges durch Änderung der Form der elastischen Linse. Sie führt dazu, dass ein Objekt, das sich in einer beliebigen Entfernung zwischen dem individuell unterschiedlichen optischen Nah- und Fernpunkt befindet, scharf auf der Netzhautebene abgebildet wird (Wikipedia)

## Sonderregelung für Inhaber einer bis zum 31. Dezember 1998 erteilten Fahrerlaubnis

|                                  |                                            |                         |                                       |
|----------------------------------|--------------------------------------------|-------------------------|---------------------------------------|
| Bei Fahrerlaubnisinhabern der    | Klassen 1, 1a, 1b, 3, 4, 5 <sup>2)</sup> ) | Klasse 2                | Fahrerlaubnis zur Fahrgastbeförderung |
| Bei Beidäugigkeit                | 0,4/0,2                                    | 0,7/0,2 <sup>2)</sup> ) | 0,7/0,5 <sup>3)</sup> )               |
| Bei Einäugigkeit <sup>1)</sup> ) | 0,6                                        | 0,7                     | 0,7 <sup>3)</sup> )                   |

- 1) Als einäugig gilt auch, wer auf einem Auge eine Sehschärfe von weniger als 0,2 besitzt.
- 2) **Nachweis ausreichenden Wahrnehmungsvermögens bereits bei Sehschärfe unter 0,5 auf dem schlechteren Auge erforderlich.**
- 3) Sehschärfe unter 0,5 auf dem schlechteren Auge oder Einäugigkeit nur zulässig bei Beschränkung der Fahrerlaubnis zur Fahrgastbeförderung auf Taxen und Mietwagen.

### Hinweis:

Bei den Sonderregelungen fällt auf, dass bei Inhabern der FE-Klassen 1, 1a, 1b, 3, 4, 5 nur ein Visus von mindestens 0,4 gefordert wird. Mit der Fußnote wird jedoch ergänzt, dass bei einem Visus < 0,5 ein ausreichendes Wahrnehmungsvermögen nachgewiesen muss. Hierunter ist zu verstehen, dass die betroffene Person Objekte nicht nur als solche erkennen, sondern auch schlussfolgern muss, was die Objekte darstellten und ob ggf. Gefahren von ihnen ausgehen.

Beispiel: ein Kleinkind am Straßenrand, darf nicht nur als Kind wahrgenommen werden, sondern es muss in Erwägung gezogen werden, dass das Kind unvermittelt auf die Straße tritt. Dies wiederum erfordert eine erhöhte Aufmerksamkeit und Bremsbereitschaft.

Das ausreichende Wahrnehmungsvermögen muss durch ein ärztliches Attest/Gutachten nachgewiesen werden.

Im Umkehrschluss heißt das, dass ein (nachgewiesener) Visus von 0,5 ausreicht, um ein Kraftfahrzeug ohne Weiteres führen zu können.

### ***Polizeiliche Überprüfung***

Bei der polizeilichen Überprüfung eines Fahrzeugführers wird ausschließlich der Fernvisus getestet. Die Überprüfung wird vor Ort bei den jeweils herrschenden Lichtverhältnissen durchgeführt.

Bei Dunkelheit kann eine externe Lichtquelle genutzt werden. Dabei ist darauf zu achten, dass der Proband nicht geblendet wird.

### ***Visus-Überprüfung mit Sehtafel***

Für die Überprüfung werden eine

- Sehtafel mit Landolt-Ringen für Visus 0,5

benötigt.

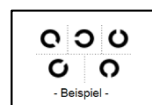

Die Sehtafel ist in dem vorgegebenen Abstand zu platzieren.

Der Proband aufgefordert, die Position der Ringöffnung zu benennen.

Hierbei wird folgende Terminologie empfohlen:

|                                                                                   |        |                                                                                   |              |
|-----------------------------------------------------------------------------------|--------|-----------------------------------------------------------------------------------|--------------|
|  | oben   |  | oben rechts  |
|  | unten  |  | unten rechts |
|  | rechts |  | oben links   |
|  | links  |  | unten links  |

Die Überprüfung wird gleichzeitig mit beiden Augen durchgeführt. Eine Einzeltestung der Augen erfolgt nicht.

Auf den Sehtafeln befinden sich zwei Reihen mit jeweils 5 Landolt-Ringen. Die über den Ringen befindliche Zahlenreihe dient nur der „Orientierung“ und ist für den Test ohne Bedeutung. Für die Überprüfung reicht das Lesen einer Reihe aus. Es sollten mindestens 3 von 5 Ringöffnungen richtig erkannt werden. Im Zweifel kann die zweite Reihe ergänzend gelesen werden.

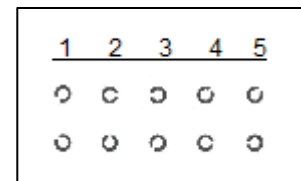

Bei weniger als 3 richtigen Ergebnissen kann von einer nicht ausreichenden Sehschärfe ausgegangen werden; die Weiterfahrt sollte deshalb bis zur einer augenärztlichen Untersuchung untersagt werden.

### **Visus-Überprüfung mit Handy-App (Snellen Chart)**

Anpassung der App gemäß Vorgaben

| App-Vorgaben                   | Einstellungen am Handy                                |
|--------------------------------|-------------------------------------------------------|
| Input Unit System              | Metric                                                |
| Snellen Fraction Denominator   | 20/20                                                 |
| Distance from User to Display  | <i>nach Gegebenheit einstellen</i>                    |
| Screen Diagonal Size           | <i>richtet sich nach den Anforderungen des Handys</i> |
| Horizontal Resolution          |                                                       |
| Vertical Resolution            |                                                       |
| Selected Optotype Display Mode | Single                                                |
| Selected Optotype              | Landolt C                                             |
| Contrast                       | 255                                                   |
| Set Custom Acuity Limits       | Haken setzen                                          |
| Set Upper Acuity Limit         | 0.39                                                  |
| Set Lower Acuity Limit         | 0.51                                                  |
| Low Color Mode                 | aus                                                   |
| Optotype Background Color      | keine Änderung (#ffffff)                              |
| Optotype Color                 | keine Änderung (#000000)                              |
| Bottom Results Font Size       | keine Änderung                                        |

Der Abstand zwischen Proband und Handy ist größer als 1,5 m zu wählen. Die Entfernung ist in den Einstellungen einzutragen.

Handhabung und Bedienung:

- nach dem Aufrufen der App erscheint ein Landolt-Ring auf dem Display
- die Dezimalzahl unten rechts zeigt den zu prüfenden Visus an
- die Landolt-Ringe für den Visus 0,4 sind für den „Probelauf“ vorgesehen
- durch Streichen auf dem Display nach oben wird der Visus auf 0,5 verändert
- durch Streichen von rechts nach links wird die Ringöffnung verändert
- es sind 5 Landolt-Ringe zu zeigen und von dem Probanden richtig zu lesen
- es sollten mindestens 3 Ringöffnungen richtig erkannt werden
- im Zweifel kann ein zweiter Durchlauf durchgeführt werden

Bei weniger als 3 richtigen Ergebnissen kann von einer nicht ausreichenden Sehschärfe ausgegangen werden; die Weiterfahrt sollte deshalb bis zur einer augenärztlichen Untersuchung untersagt werden.

#### Begründung für die Untersagung der Weiterfahrt

Je reduzierter Sehschärfe ist, desto später erfolgt die Wahrnehmung eines Objektes und umso kürzer ist die Erkennungsstanz, um Gefahrenobjekte zu erkennen.

Diese Abfolge stellt – insbesondere bei hohen Geschwindigkeiten – eine erhebliche Gefahr für den Probanden selbst und andere Verkehrsteilnehmer dar.

#### Besonderheit Dunkelheit

Die (zentrale) Sehschärfe ist von den herrschenden Lichtverhältnissen abhängig. Bei Dunkelheit (nachts) ist die zentrale Sehschärfe bereits auf etwa die Hälfte des Normalwertes abgesunken.

Dies bedeutet, dass selbst ein normal Sehtüchtiger unter den Bedingungen des nächtlichen Straßenverkehrs nur noch eine Sehschärfe besitzt, die etwa halb so groß ist, wie diejenige, die er vom Tage her gewöhnt ist.<sup>2</sup>

Wird bei der Überprüfung vor Ort bei Dunkelheit eine nicht mehr ausreichende Sehleistung festgestellt, sollte der Sehtest bei besseren Lichtverhältnissen (z.B. auf der Dienststelle) erneut durchgeführt werden. Wird hier der Test erfolgreich absolviert, könnte bis zur augenärztlichen Klärung die Weiterfahrt bei Tageslicht gestattet und bei Dämmerung / Dunkelheit untersagt werden.

#### **Zusammenfassung**

Das beschriebene Verfahren wurde in Zusammenarbeit mit der Augenklinik<sup>3</sup> der MHH entwickelt.

Mit dem Testverfahren soll lediglich das gesetzlich geforderte Mindestmaß an der Sehschärfe getestet werden.

---

<sup>2</sup> Prof. Dr. med. Dr. rer. nat Bernhard Lachenmayr

<sup>3</sup> Prof. Dr. med. Carsten Framme, MBA; OA Dr. med. Martin Bartram

**Die Überprüfung ersetzt nicht eine augenärztliche Untersuchung oder einen amtlichen Sehtest!**

Das Ergebnis ist jedoch so aussagekräftig, dass auf Basis dessen weitere polizeiliche Maßnahmen (z.B. Untersagung der Weiterfahrt) getroffen werden können.
